# Supplementary material
Source: Research Square preprint supplement (doi:10.21203/rs.3.rs-9052503/v1)
Supplement: Supplementary file 1 [file 09cdebaaa1066a1fa86837ca.docx]

**Supplementary Figure 1**

**
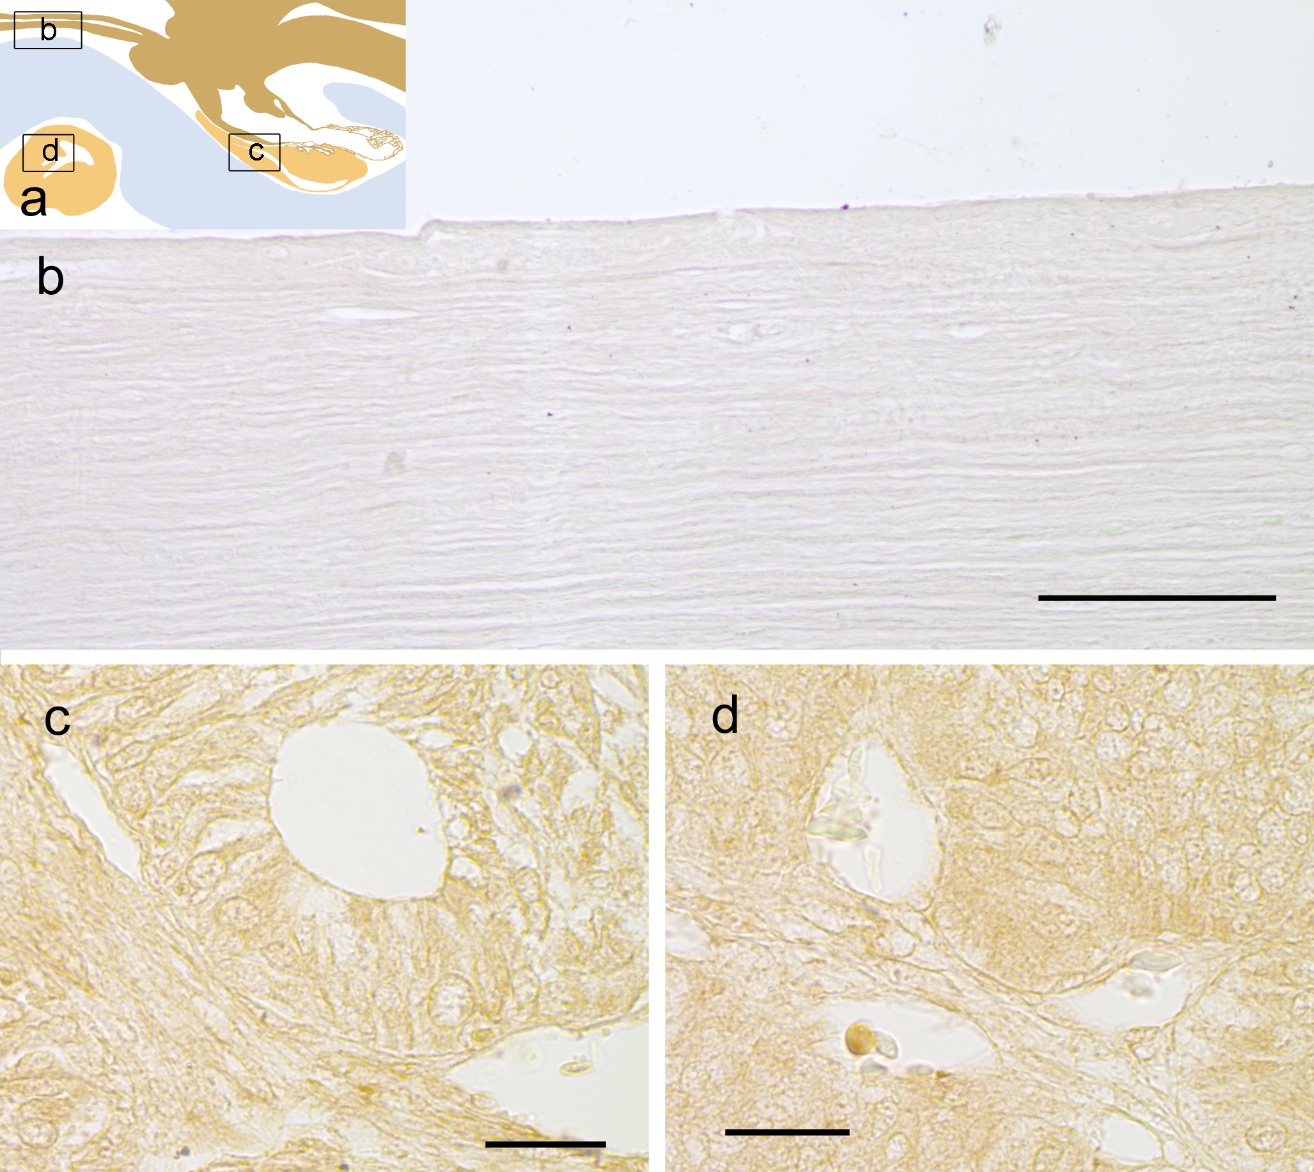
**

**Supplementary Figure 2**

**
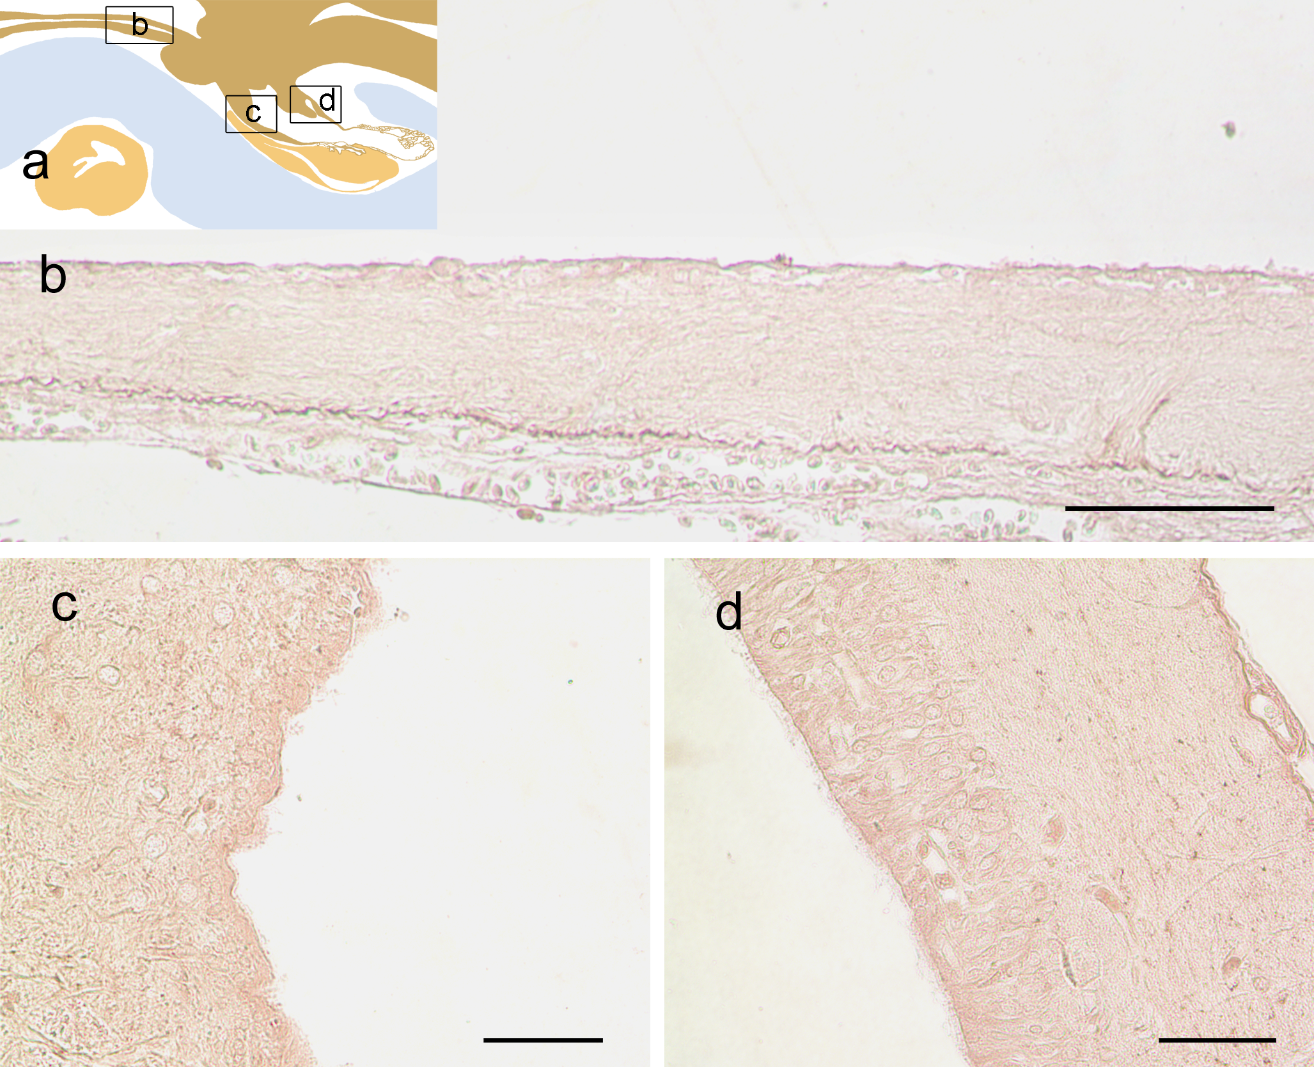
**

**Supplementary Figure 3**

**
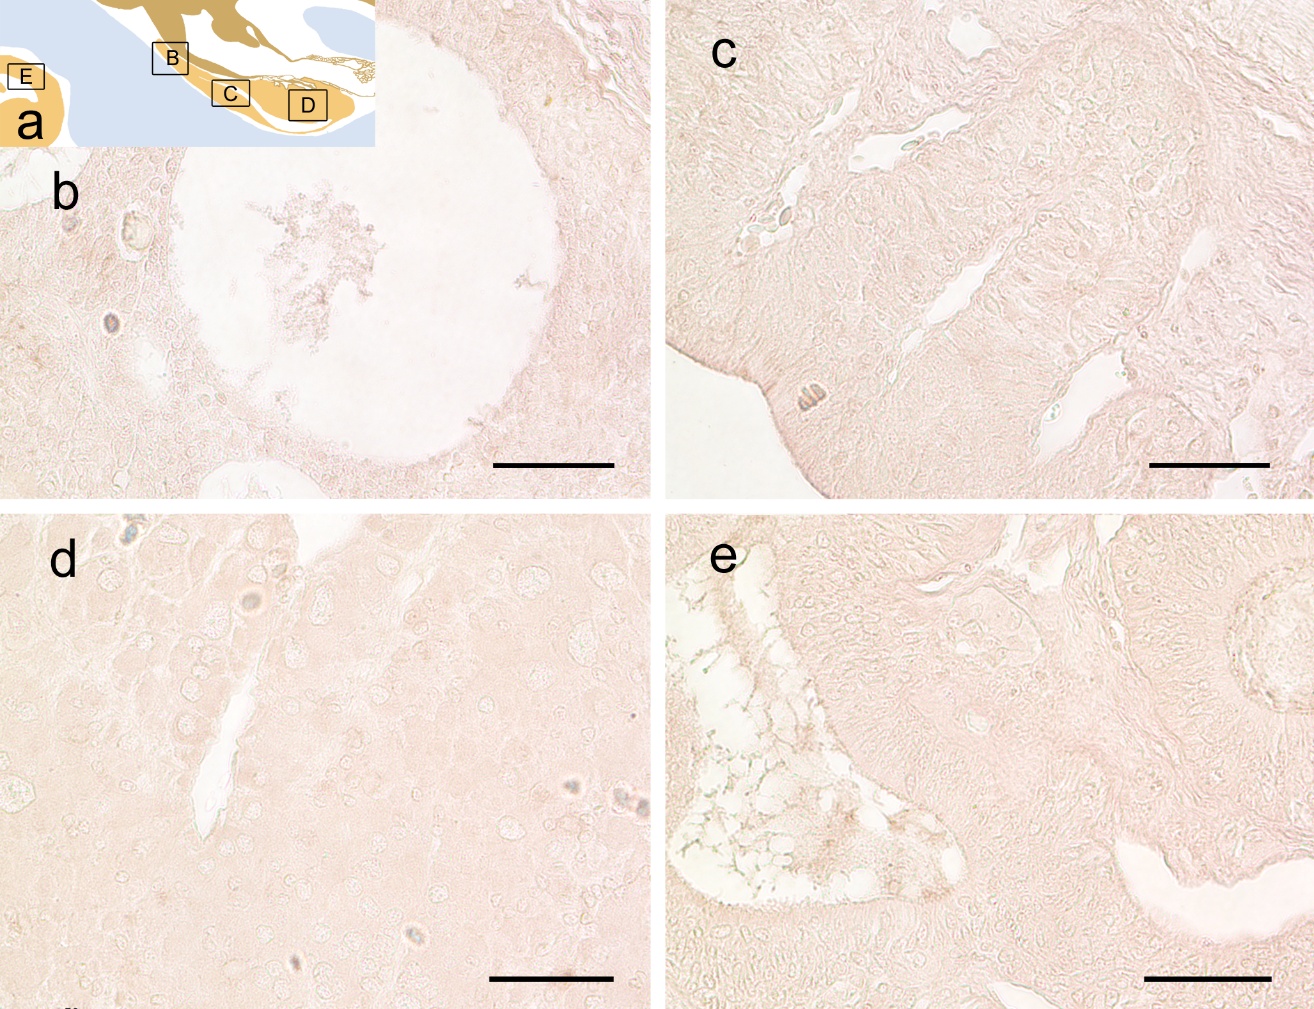
**

**Supplementary Figure 4**

**
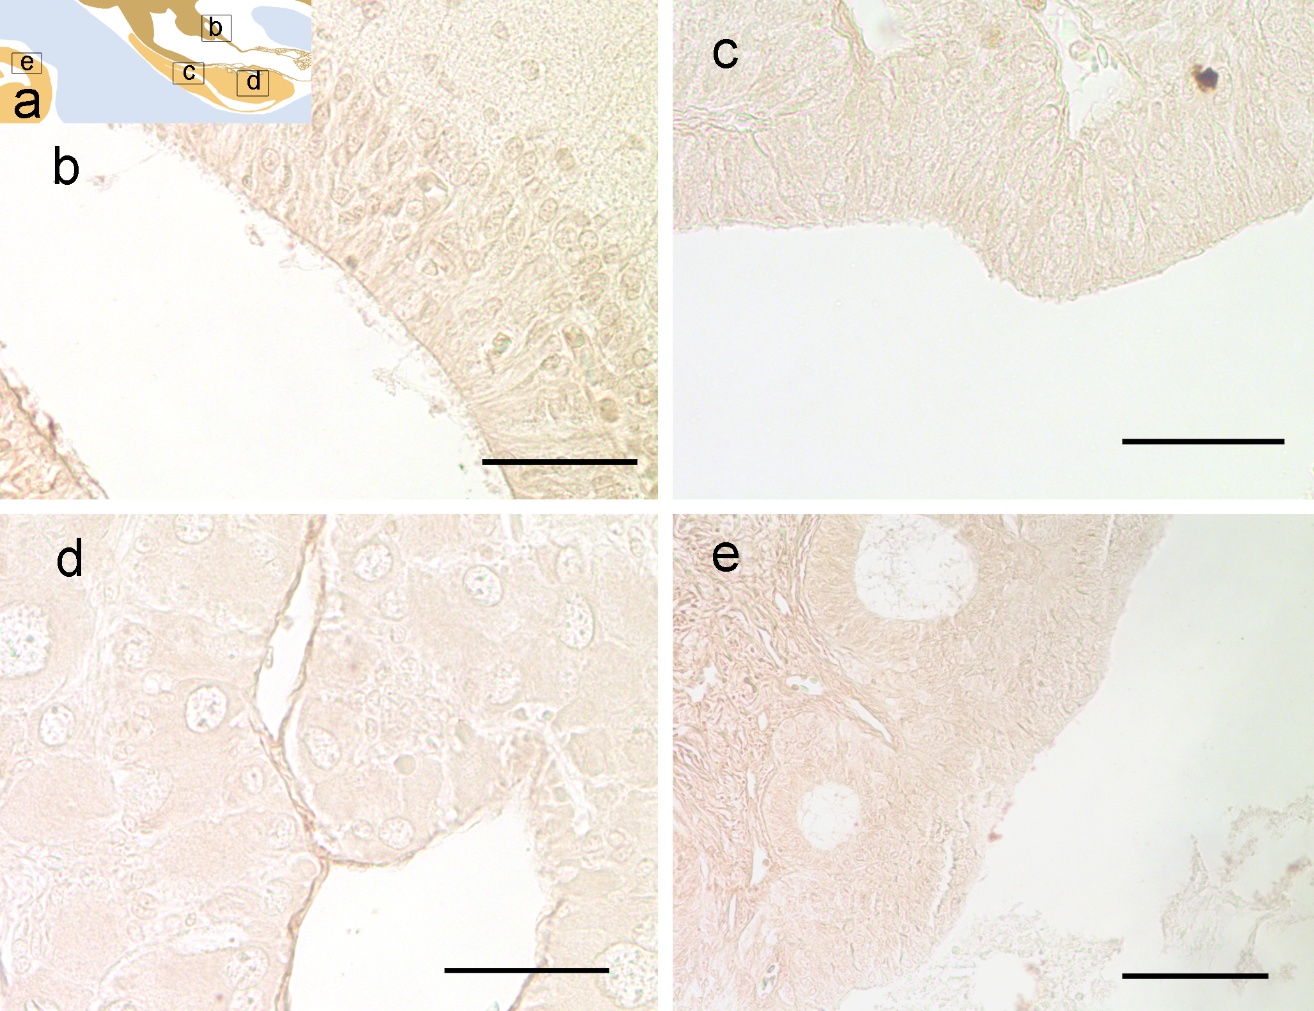
**

**Supplementary Figure 5**

**
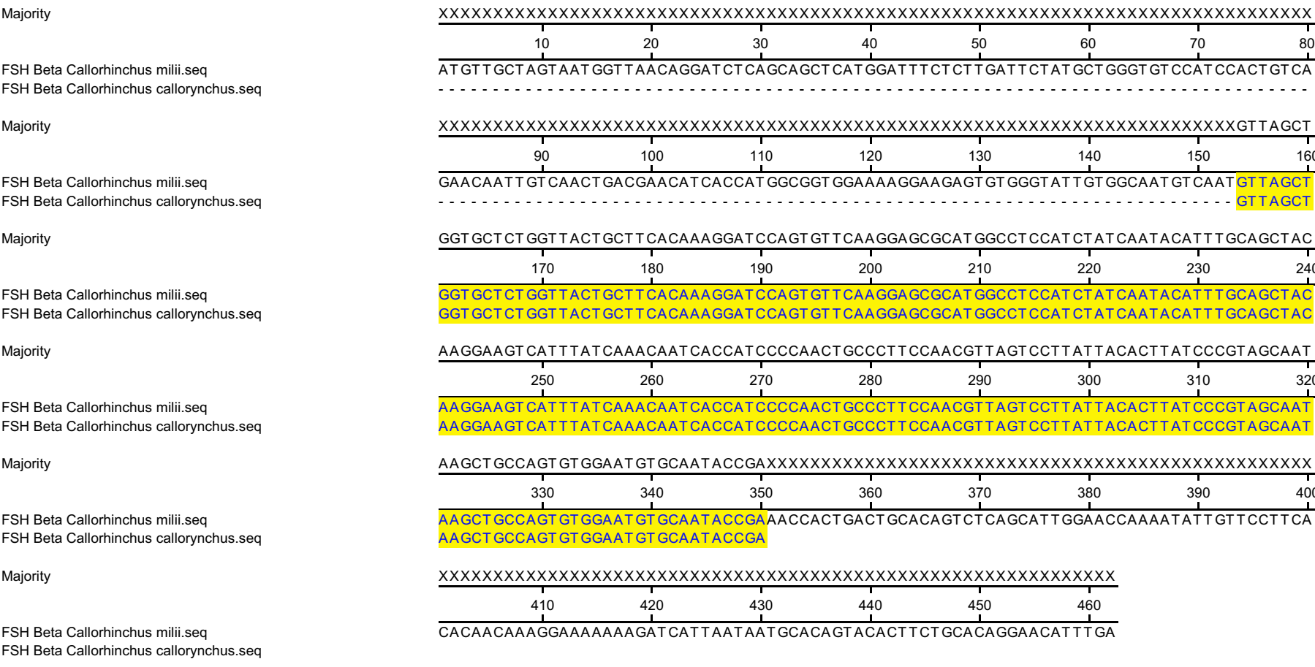
**

**Supplementary Figure 6**

**
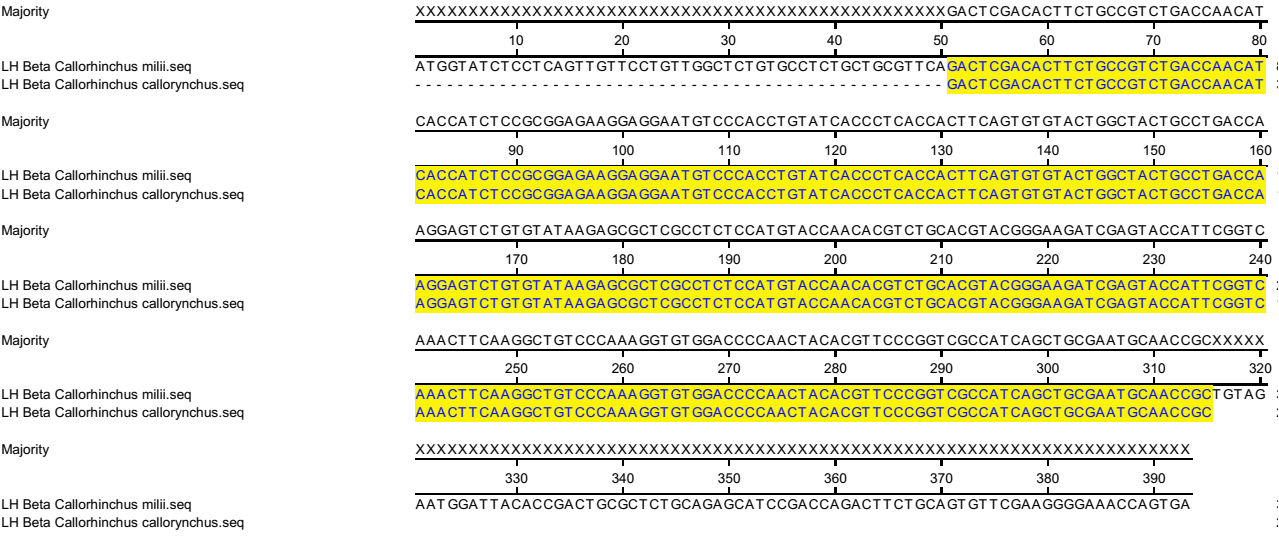
**
